# Supplementary material for: Ultra-Small Nanoparticles of Pd-Pt-Ni Alloy Octahedra with High Lattice Strain for Efficient Oxygen Reduction Reaction
Source: MDPI journal article supplement (doi:10.3390/catal13010097), 2023-01-03
Supplement: s1 [file s1]

## Supplementary

### **Ultra-small nanoparticles of Pd-Pt-Ni alloy octahedra with high lattice strain for efficient oxygen reduction reaction**

Yuanyan Luo<sup>1</sup>, Wenhua Lou<sup>1</sup>, Huiyan Feng<sup>1</sup>, Zhihang Liu<sup>1</sup>, Qiuyan Chen<sup>1</sup>, Guizhen Liao<sup>1</sup>, Xiaoting Huang<sup>1</sup>, Panagiotis Tsiakaras<sup>2\*</sup>, Pei Kang Shen<sup>1\*</sup>.

<sup>1</sup> Collaborative Innovation Center of Sustainable Energy Materials, School of Physical Science and Technology, Guangxi University; Guangxi Key Laboratory of Electrochemical Energy Materials; Key Laboratory of New Processing Technology for Non-ferrous Metal and Materials of Ministry of Education, Nanning, 530004, China.

<sup>2</sup> Laboratory of Alternative Energy Conversion Systems Department of Mechanical Engineering School of Engineering, University of Thessaly 1 Sekeri Str., Pedion Areos 38834 Greece.

\*Corresponding Authors: pkshen@gxu.edu.cn (PK Shen); tsiak@uth.gr (P. Tsiakaras)

## Supplementary Figures S1-S4

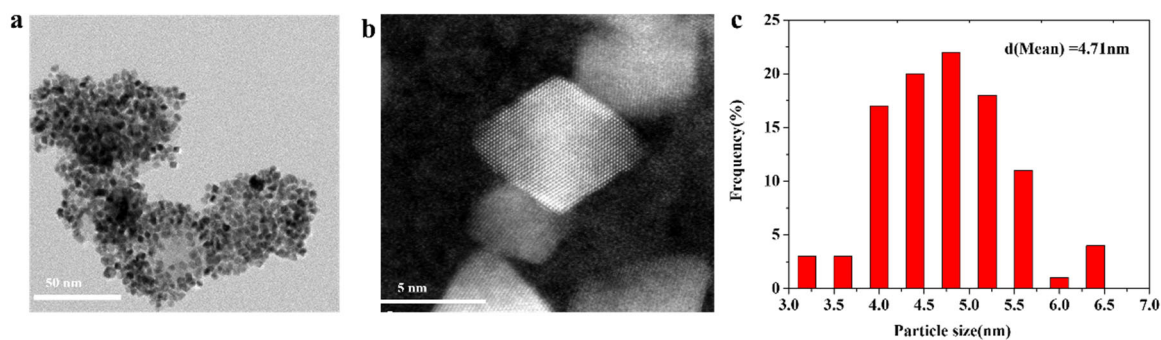

**Figure. S1.** (a-b) TEM image of Pd-Pt-Ni Octa1. (c) corresponding particle size distribution.

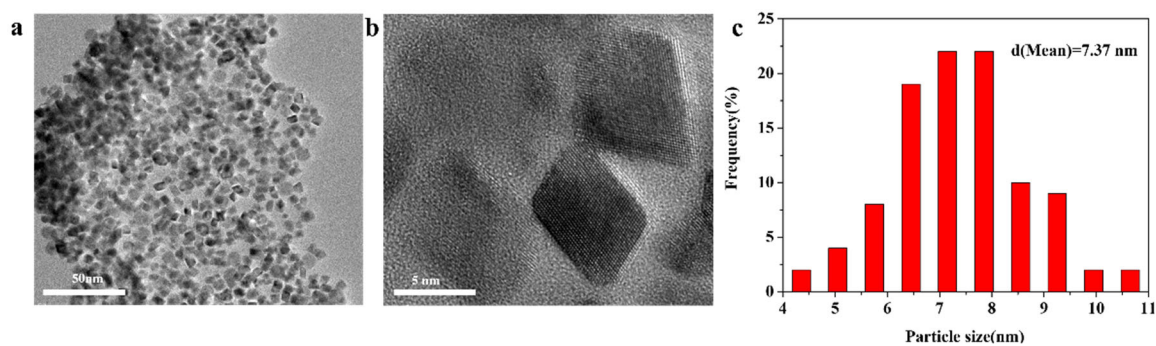

**Figure. S2.** (a-b) TEM image of Pd-Pt-Ni Octa2 (c) corresponding particle size distribution.

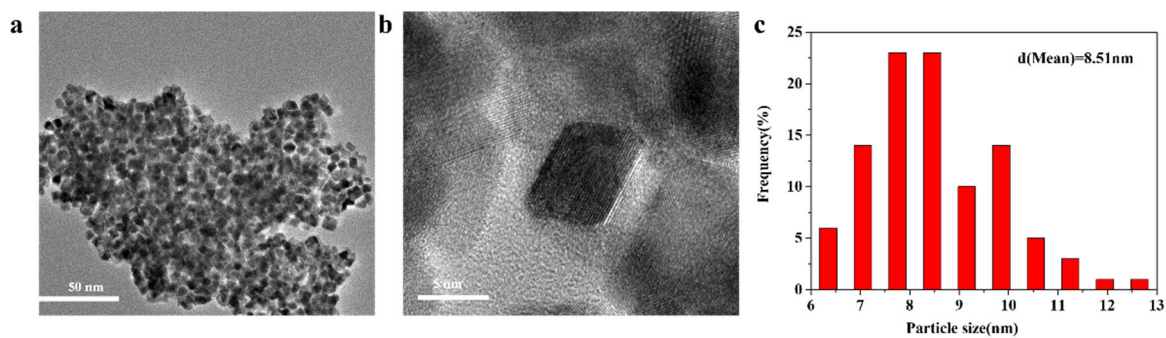

**Figure. S3.** (a-b) TEM image of Pd-Pt-Ni Octa3 (c) corresponding particle size distribution.

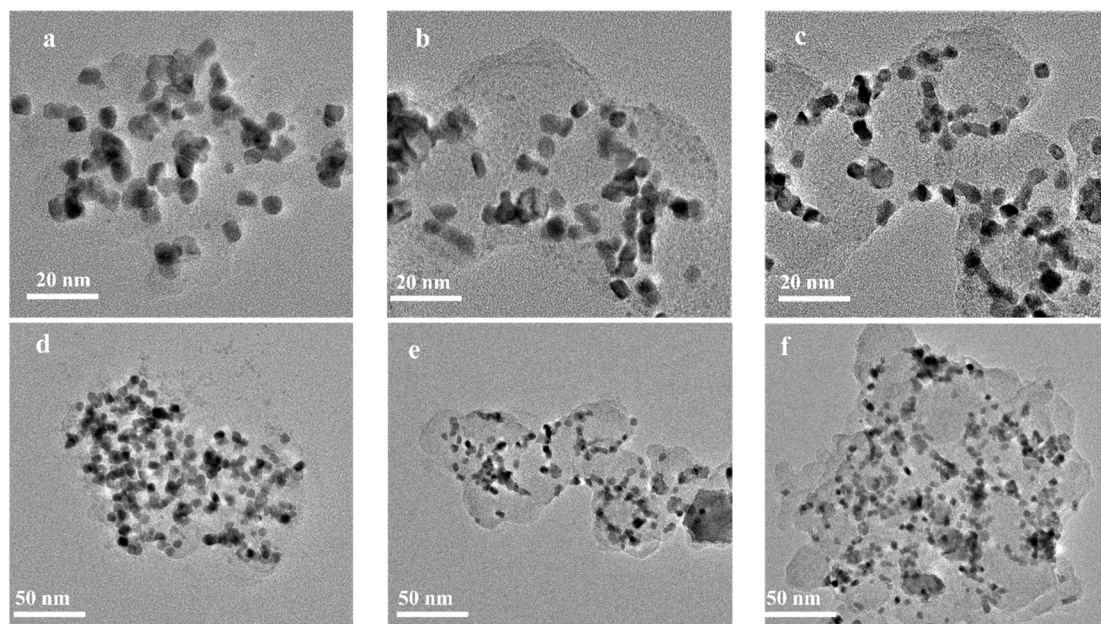

**Figure.S4.** (a-f) TEM images after 10k cycles of Pd-Pt-Ni Octa1

### Supplementary Tables S1-S6

**Table S1.** Pt, Pd and Ni atomic ratio examined of Pd-Pt-Ni Octa1, Pd-Pt-Ni Octa2, Pd-Pt-Ni Octa3 by XPS and ICP-OES.

| Samples        | XPS (Pt%/ Pd%/ Ni%) | ICP-OES (Pt%/ Pd%/ Ni%) |
|----------------|---------------------|-------------------------|
| Pd-Pt-Ni Octa1 | 67.8/19.5/12.6      | 58.4/35.8/5.7           |
| Pd-Pt-Ni Octa2 | 63.7/16.5/19.7      | 55.3/37.4/7.2           |
| Pd-Pt-Ni Octa3 | 38.1/14.9/47.1      | 55.3/37.3/7.4           |

**Table S2.** The relevant Lattice parameter correlated to Pt(111) plane (nm) and calculated strain of Pt, Pd-Pt-Ni Octa1, Pd-Pt-Ni Octa2 and Pd-Pt-Ni Octa3.

| Sample         | XRD    | Strain (%) | FFT    | Strain (%) | VASP   | Strain (%) |
|----------------|--------|------------|--------|------------|--------|------------|
| Pt             | 0.2265 | -----      | 0.2265 | -----      | 0.2807 | -----      |
| Pd-Pt-Ni Octa1 | 0.2239 | 1.14       | 0.2160 | 4.63       | 0.2709 | 3.49       |
| Pd-Pt-Ni Octa2 | 0.2250 | 0.67       | 0.2220 | 1.98       | -----  | -----      |
| Pd-Pt-Ni Octa3 | 0.2258 | 0.31       | 0.2236 | 1.28       | -----  | -----      |

**Table S3.** When the gas phase water was at 0.035 bar and T=298 K, the gas phase water was in equilibrium with liquid water. The following data are calculated at this equilibrium state.

| Species             | E (eV) | $\Delta G(T)$ (eV) | G (eV) |
|---------------------|--------|--------------------|--------|
| O <sub>2</sub> (g)  |        |                    | -9.72  |
| H <sub>2</sub> (g)  | -6.77  | -0.04              | -6.81  |
| H <sub>2</sub> O(l) | -14.22 | 0.09               | -14.13 |

**Table S4.** Gibbs free energy in a four-electron reaction, while product1 stands for  $2(\text{H}^+ + \text{e}^-) + \text{H}_2\text{O}$  and product2 stands for  $\text{H}^+ + \text{e}^- + \text{H}_2\text{O}$ ,  $U=0$  V

| Matrix     | $\Delta\text{G}(2\text{H}_2 + \text{O}_2)$<br>(eV) | $\Delta\text{G}(*\text{OOH} + \text{product1})$<br>(eV) | $\Delta\text{G}(*\text{O} + \text{product2})$<br>(eV) | $\Delta\text{G}(*\text{OH} + \text{product3})$<br>(eV) | $\Delta\text{G}(2\text{H}_2\text{O})$<br>(eV) |
|------------|----------------------------------------------------|---------------------------------------------------------|-------------------------------------------------------|--------------------------------------------------------|-----------------------------------------------|
| Pt (111)   | 4.80                                               | 4.09                                                    | 1.81                                                  | 1.12                                                   | 0                                             |
| Pd-Pt-Ni   | 4.80                                               | 4.02                                                    | 1.71                                                  | 1.05                                                   | 0                                             |
| Octa1(111) |                                                    |                                                         |                                                       |                                                        |                                               |

**Table S5:** In the four-electron reaction, the **Gipps free energy of Pd-Pt-Ni Octa1 (111) in ORR** each step at 1.23V is as follows:  $\Delta\text{G}(\text{H}_2\text{O}) = 0$ ,  $\Delta\text{G}(*\text{OH}) = 1.12 - 1.23$ ,  $\Delta\text{G}(*\text{O}) = 1.81 - 2 \times 1.23$ ,  $\Delta\text{G}(*\text{OOH}) = 4.09 - 3 \times 1.23$ ,  $\Delta\text{G}(\text{O}_2) = 4.8 - 4 \times 1.23$ .

In the four-electron reaction, the **Gipps free energy of Pt/C in ORR** each step at 1.23V is as follows:  $\Delta\text{G}(\text{H}_2\text{O}) = 0$ ,  $\Delta\text{G}(*\text{OH}) = 1.05 - 1.23$ ,  $\Delta\text{G}(*\text{O}) = 1.71 - 2 \times 1.23$ ,  $\Delta\text{G}(*\text{OOH}) = 4.02 - 3 \times 1.23$ ,  $\Delta\text{G}(\text{O}_2) = 4.8 - 4 \times 1.23$ .

| Matrix     | $\Delta\text{G}(2\text{H}_2 + \text{O}_2)$<br>(eV) | $\Delta\text{G}(*\text{OOH} + \text{product1})$<br>(eV) | $\Delta\text{G}(*\text{O} + \text{product2})$<br>(eV) | $\Delta\text{G}(*\text{OH} + \text{product3})$<br>(eV) | $\Delta\text{G}(2\text{H}_2\text{O})$<br>(eV) |
|------------|----------------------------------------------------|---------------------------------------------------------|-------------------------------------------------------|--------------------------------------------------------|-----------------------------------------------|
| Pt (111)   | -0.12                                              | 0.40                                                    | -0.65                                                 | -0.11                                                  | 0                                             |
| Pd-Pt-Ni   | -0.12                                              | 0.33                                                    | -0.75                                                 | -0.18                                                  | 0                                             |
| Octa1(111) |                                                    |                                                         |                                                       |                                                        |                                               |

**Table S6.** Performance of Pd-Pt-Ni Octa1, Pd-Pt-Ni Octa2 and Pd-Pt-Ni Octa3 catalyst compared to Pt/C.

| Catalyst       | Half-wave<br>potential $E_{1/2}$<br>(V) | Mass activity<br>( $\text{A mg}_{\text{Pt}}^{-1}$ )<br>at 0.9 V vs RHE | Mass activity<br>( $\text{A mg}_{\text{Pt+Pd}}^{-1}$ )<br>at 0.9 V vs RHE | Mass activity after ADT<br>( $\text{A mg}_{\text{Pt}}^{-1}$ )<br>at 0.9V vs RHE |
|----------------|-----------------------------------------|------------------------------------------------------------------------|---------------------------------------------------------------------------|---------------------------------------------------------------------------------|
| Pd-Pt-Ni Octa1 | 0.933                                   | 1.55                                                                   | 0.93                                                                      | 0.51                                                                            |
| Pd-Pt-Ni Octa2 | 0.917                                   | 0.75                                                                   | 0.48                                                                      | -----                                                                           |
| Pd-Pt-Ni Octa3 | 0.910                                   | 0.70                                                                   | 0.40                                                                      | -----                                                                           |
| Pt/C           | 0.897                                   | 0.16                                                                   | -----                                                                     | 0.09                                                                            |
